# Supplementary material
Source: HighWire-hosted journal article supplement (https://jmg.bmj.com/content/56/1/18)
Supplement: inline-supplementary-material-2 [file inline-supplementary-material-2.docx]

**Supplementary Table 2.** Regents used in experiments.

| **Regents** | **Clone** | **Application** | **Supplier** |
| --- | --- | --- | --- |
| Alexa Fluor® 647 Mouse Anti-Human TIM-3 | 565558 | Flowcytometry | BD Pharmingen |
| PE Mouse Anti-Human CD279 | 557946 | Flowcytometry | BD Pharmingen |
| FITC anti-human CD69 | 310904 | Flowcytometry | BioLegend |
| Live/Dead Fixable Red Dead Stain | L10120 | Flowcytometry | Thermofisher Scientific |
| APC anti-human CD8 | 344722 | Flowcytometry | BioLegend |
| FITC anti-human CD223 (LAG-3) | 369307 | Flowcytometry | BioLegend |
| Brilliant Violet 421 anti-human CTLA4 | 369606 | Flowcytometry | BioLegend |
| CD8 MicroBeads, human | 130-045-201 | Cells sorting | Miltenyi |
| Dynabeads Human T-Activator CD3/CD28 | 11131D | T cell activation | Thermofisher Scientific |
| Alexa Fluor® 488 anti-human Ki-67 | 558616 | Flowcytometry | BD Pharmingen |
| APC anti-human IL-2 | 500310 | Flowcytometry | BioLegend |
| Alexa Fluor® 488 anti-human IFN-γ | 502515 | Flowcytometry | BioLegend |
| PE Mouse Anti-Human TNF | 559321 | Flowcytometry | BD Pharmingen |
| PE anti-human CD8 , | 344706 | Flowcytometry | Biolegend |
| Alexa Fluor® 647 Mouse IgG1 κ Isotype Control | 565571 | Flowcytometry | BD Pharmingen |
| PE Mouse IgG1, κ Isotype Control | 555749 | Flowcytometry | BD Pharmingen |
| FITC Mouse IgG1k Isotype Ctrl Antibody | 488108 | Flowcytometry | Biolegend |
| Alexa Fluor 488 Mouse IgG1k Isotype Ctrl | 400129 | Flowcytometry | Biolegend |
| APC Rat IgG2a, κ Isotype Ctrl | 400512 | Flowcytometry | Biolegend |
